# Supplementary material
Source: publisher figshare collection journal article supplement (https://sage.figshare.com/ndownloader/files/20442960)
Supplement: Supplementary file 1 [file 20442960]

Supplementary Table 1

## Sample Demographics

| Variables                  | Sample percentage or<br><i>M (SD)</i> | Test for differences by<br>condition, $\chi^2/p$ or $F/p$ |
|----------------------------|---------------------------------------|-----------------------------------------------------------|
| Age                        | 30.41 (6.15)                          | $F(1, 301) = 1.36, p = .25$                               |
| Household Income           | 4.76 (1.80)                           |                                                           |
| ¥71,999 and below          | 3.6%                                  |                                                           |
| ¥72,000 - ¥95,999          | 7.6%                                  |                                                           |
| ¥96,000 - ¥119,999         | 12.5%                                 |                                                           |
| ¥120,000 - ¥149,999        | 20.8%                                 | $F(1, 301) = .08, p = .77$                                |
| ¥150,000 - ¥179,999        | 10.6%                                 |                                                           |
| ¥180,000 - ¥239,999        | 17.2%                                 |                                                           |
| ¥240,000 and above         | 27.4%                                 |                                                           |
| Education                  |                                       |                                                           |
| Less than high school      | 1.0%                                  |                                                           |
| High school diploma        | 2.3%                                  |                                                           |
| Some college degree        | 15.2%                                 |                                                           |
| 4-year college degree      | 72.6%                                 | $F(1, 301) = 2.02, p = .16$                               |
| Master degree              | 8.3%                                  |                                                           |
| Doctoral degree            | 0.7%                                  |                                                           |
| Relationship status        |                                       |                                                           |
| Single, never dated before | 10.6%                                 |                                                           |
| Single, but dated before   | 11.2%                                 |                                                           |
| Dating                     | 0.7%                                  | $\chi^2_{(5)} = 5.52, p = .36$                            |
| In a stable relationship   | 9.2%                                  |                                                           |
| Married                    | 68%                                   |                                                           |
| Separated or divorced      | 0.3%                                  |                                                           |
| Awareness of HPV           |                                       |                                                           |
| Heard about HPV            | 77.2%                                 | $\chi^2_{(1)} = .20, p = .66$                             |
| Awareness of HPV Vaccine   |                                       |                                                           |
| Heard about HPV Vaccine    | 87.1%                                 | $\chi^2_{(1)} = .29, p = .59$                             |
| Knowledge of HPV           | 3.27 (1.52)                           | $F(1, 301) = .07, p = .80$                                |
| Knowledge of HPV Vaccine   | 4.10 (1.53)                           | $F(1, 301) = .52, p = .47$                                |
